# Supplementary material
Source: PubMed Central journal article supplement (PMC4406473)
Supplement: NIHMS677351-supplement-supplement_1.pdf [file NIHMS677351-supplement-supplement_1.pdf]

## Appendix

**Supplementary Figure 1**

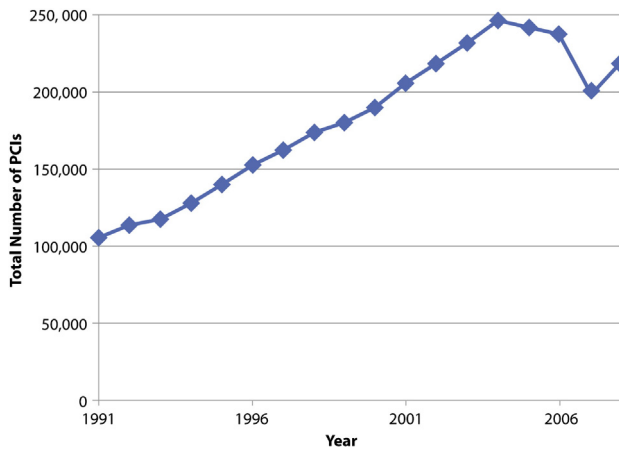

Annualized rates of PCI during the study period. Rates of PCI during the study period, 1991-2008.

**Supplementary Figure 2**

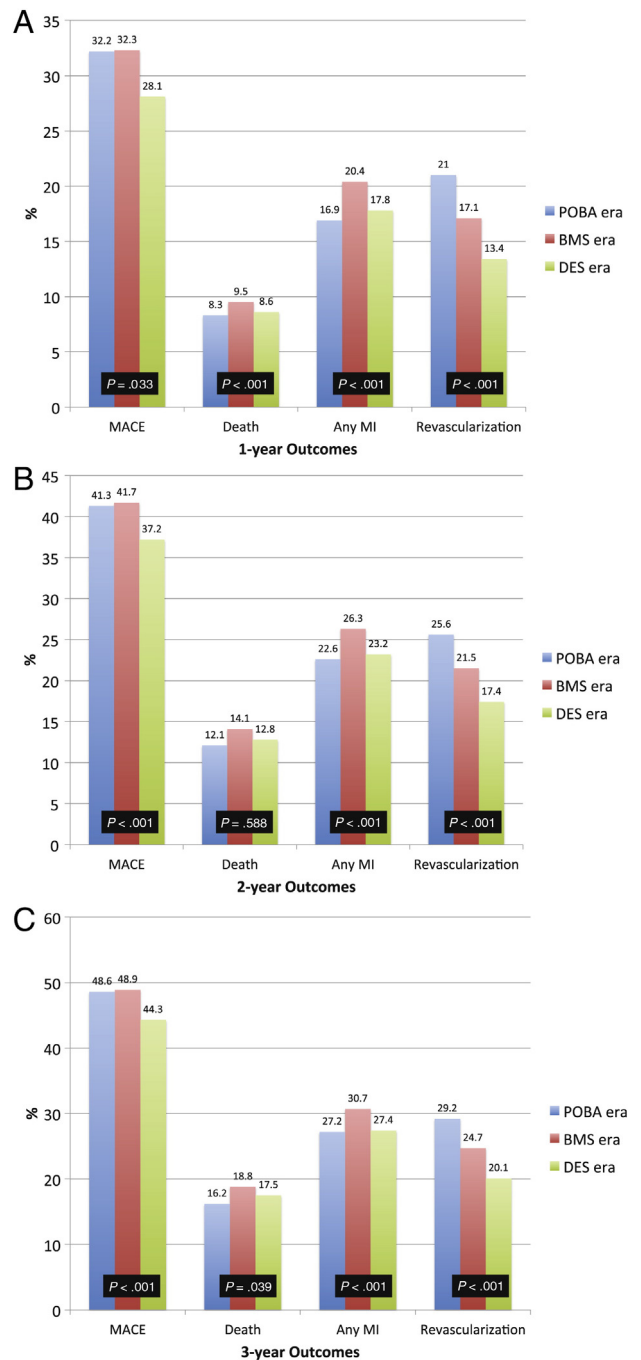

Rates of MACE, death, MI, and revascularization among female undergoing PCI in the POBA. Rates of MACE, death, MI, and revascularization among females undergoing PCI in the POBA, BMS, and DES eras among females at: (A) 1 year; (B) 2 years; and (C) 3 years of follow-up.

**Supplementary Figure 3**

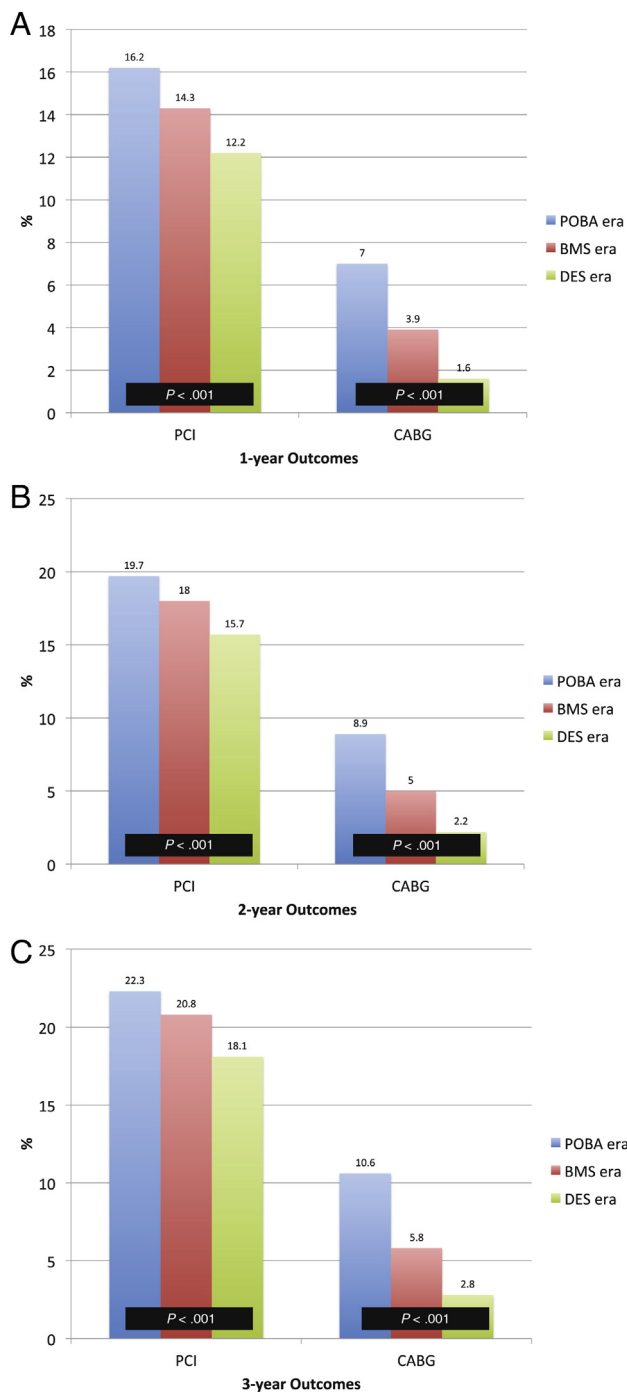

Rates of repeat PCI and CABG among females undergoing PCI. Rates of repeat PCI and CABG among females undergoing PCI at: **(A)** 1 year; **(B)** 2 years; and **(C)** 3 years of follow-up.

**Supplementary Figure 4**

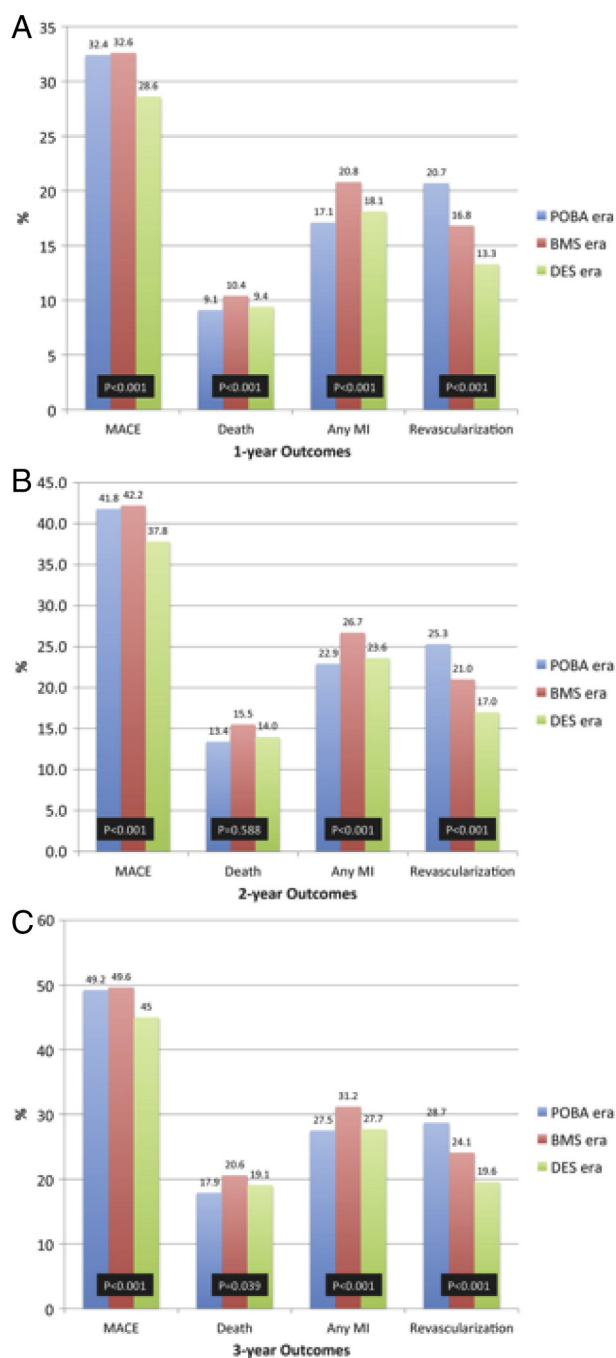

Rates of MACE, death, MI, and revascularization among patients  $\geq 75$  years old. Rates of MACE, death, MI, and revascularization among patients  $\geq 75$  years old undergoing PCI in the POBA, BMS, and DES eras among females at: **(A)** 1 year; **(B)** 2 years; and **(C)** 3 years of follow-up.

**Supplementary Figure 5**

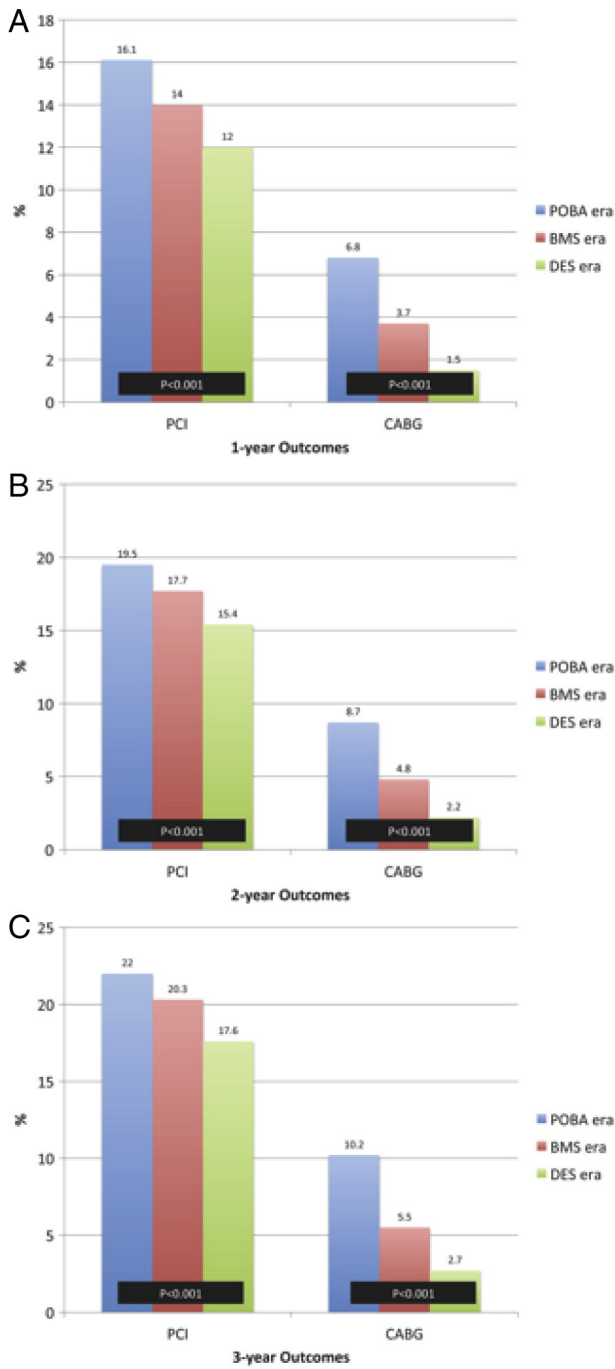

Rates of PCI and CABG among patients  $\geq 75$  years old. Rates of repeat PCI and CABG among patients  $\geq 75$  years old undergoing PCI at: (A) 1 year; (B) 2 years; and (C) 3 years of follow-up.

**Supplementary Table I.** Adjusted association (HRs and 95% CIs) between female sex and outcomes across PCI eras (male sex as the reference)\*

| Event             | Months to event | POBA era            | BMS era             | DES era             |
|-------------------|-----------------|---------------------|---------------------|---------------------|
| MACE              | 12              | 0.982 (0.973-0.992) | 1.065 (1.058-1.072) | 1.060 (1.050-1.070) |
|                   | 24              | 0.971 (0.963-0.979) | 1.044 (1.038-1.050) | 1.041 (1.032-1.050) |
|                   | 36              | 0.965 (0.957-0.972) | 1.026 (1.020-1.032) | 1.031 (1.023-1.039) |
| Death             | 12              | 0.954 (0.936-0.972) | 0.984 (0.972-0.997) | 1.008 (0.990-1.026) |
|                   | 24              | 0.913 (0.899-0.927) | 0.940 (0.930-0.950) | 0.978 (0.964-0.992) |
|                   | 36              | 0.896 (0.884-0.908) | 0.920 (0.911-0.928) | 0.966 (0.954-0.979) |
| MI                | 12              | 1.036 (1.023-1.050) | 1.114 (1.104-1.124) | 1.129 (1.115-1.143) |
|                   | 24              | 1.016 (1.005-1.028) | 1.084 (1.076-1.093) | 1.093 (1.081-1.105) |
|                   | 36              | 1.008 (0.998-1.019) | 1.065 (1.057-1.072) | 1.077 (1.067-1.088) |
| Revascularization | 12              | 0.929 (0.918-0.940) | 0.988 (0.979-0.988) | 0.955 (0.941-0.968) |
|                   | 24              | 0.924 (0.915-0.934) | 0.979 (0.971-0.987) | 0.954 (0.943-0.966) |
|                   | 36              | 0.920 (0.910-0.929) | 0.963 (0.955-0.971) | 0.950 (0.939-0.961) |
| PCI               | 12              | 0.960 (0.948-0.973) | 1.004 (0.994-1.015) | 0.972 (0.958-0.987) |
|                   | 24              | 0.961 (0.950-0.973) | 0.999 (0.990-1.009) | 0.972 (0.960-0.985) |
|                   | 36              | 0.960 (0.949-0.971) | 0.984 (0.975-0.992) | 0.970 (0.958-0.982) |
| CABG              | 12              | 0.870 (0.853-0.888) | 0.951 (0.932-0.970) | 0.857 (0.822-0.893) |
|                   | 24              | 0.854 (0.839-0.870) | 0.929 (0.913-0.946) | 0.864 (0.835-0.895) |
|                   | 36              | 0.849 (0.835-0.863) | 0.911 (0.896-0.926) | 0.859 (0.832-0.886) |

All abbreviations can be found in [Tables I and II](#).

\*Adjusted for age, sex, race, atrial fibrillation, cardiogenic shock, and Deyo-Charlson index.

**Supplementary Table II.** Adjusted association (HRs and 95% CIs) between age >75 years and outcomes across PCI eras (age <75 years as the reference)\*

| Event             | Months to event | POBA era            | BMS era             | DES era             |
|-------------------|-----------------|---------------------|---------------------|---------------------|
| MACE              | 12              | 1.062 (1.051-1.073) | 1.170 (1.162-1.178) | 1.209 (1.197-1.221) |
|                   | 24              | 1.078 (1.069-1.088) | 1.171 (1.163-1.178) | 1.189 (1.179-1.199) |
|                   | 36              | 1.093 (1.084-1.102) | 1.179 (1.172-1.186) | 1.190 (1.181-1.199) |
| Death             | 12              | 1.821 (1.787-1.855) | 1.803 (1.780-1.827) | 1.821 (1.789-1.854) |
|                   | 24              | 1.779 (1.752-1.806) | 1.796 (1.777-1.815) | 1.790 (1.764-1.816) |
|                   | 36              | 1.792 (1.768-1.816) | 1.822 (1.806-1.839) | 1.800 (1.777-1.823) |
| MI                | 12              | 1.145 (1.129-1.161) | 1.275 (1.263-1.286) | 1.283 (1.267-1.299) |
|                   | 24              | 1.139 (1.125-1.152) | 1.249 (1.239-1.258) | 1.238 (1.225-1.252) |
|                   | 36              | 1.139 (1.127-1.152) | 1.237 (1.228-1.246) | 1.221 (1.209-1.233) |
| Revascularization | 12              | 0.881 (0.870-0.893) | 0.878 (0.870-0.887) | 0.908 (0.895-0.921) |
|                   | 24              | 0.869 (0.858-0.879) | 0.862 (0.854-0.869) | 0.864 (0.853-0.875) |
|                   | 36              | 0.854 (0.844-0.863) | 0.848 (0.841-0.855) | 0.842 (0.832-0.852) |
| PCI               | 12              | 0.936 (0.922-0.950) | 0.918 (0.908-0.928) | 0.930 (0.916-0.944) |
|                   | 24              | 0.929 (0.917-0.942) | 0.901 (0.893-0.910) | 0.884 (0.872-0.896) |
|                   | 36              | 0.918 (0.906-0.930) | 0.887 (0.879-0.895) | 0.863 (0.853-0.874) |
| CABG              | 12              | 0.724 (0.707-0.742) | 0.699 (0.684-0.714) | 0.700 (0.671-0.731) |
|                   | 24              | 0.703 (0.688-0.718) | 0.678 (0.666-0.691) | 0.680 (0.656-0.705) |
|                   | 36              | 0.686 (0.672-0.699) | 0.665 (0.653-0.676) | 0.653 (0.632-0.675) |

All abbreviations can be found in [Tables I and II](#).

\*Adjusted for age, sex, race, atrial fibrillation, cardiogenic shock, and Deyo-Charlson index.
